# Supplementary material for: Purification and Characterization of a Polyextremophilicα-Amylase from an Obligate HalophilicAspergillus penicillioidesIsolate and Its Potential for Souse with Detergents
Source: Hindawi journal article supplement (doi:10.1155/2015/245649), 2015-01-01
Supplement: f1 [file 245649.f1.pdf]

## Supplementary information

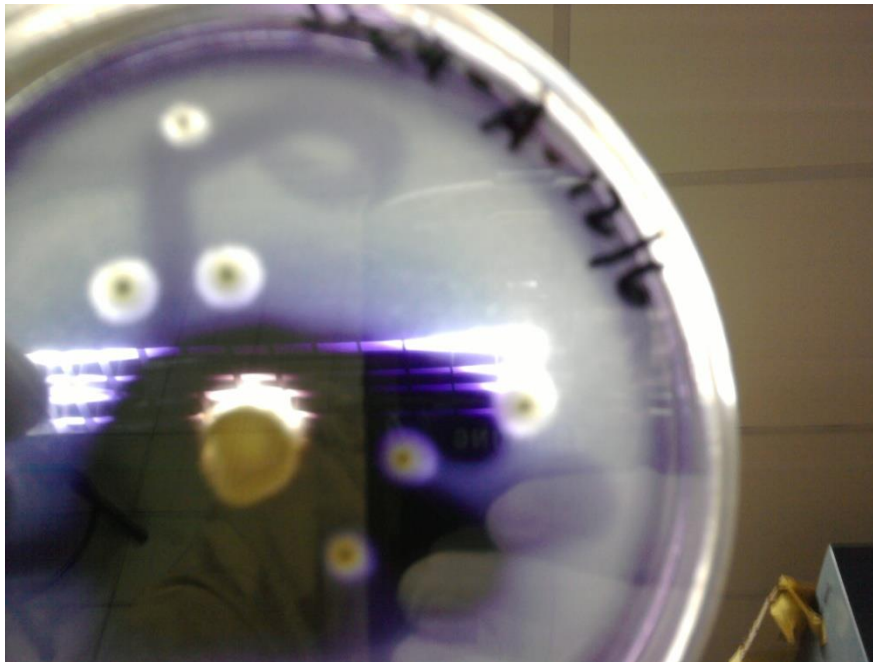

**Fig. S1** Enzyme plate screening for extracellular  $\alpha$ -amylase production by *A. penicilliioides* TISTR 3639 on potato dextrose agar plates supplemented with 10 g.L<sup>-1</sup> soluble starch. The clear zone of hydrolyzed starch was highlighted by staining the residual starch with iodine solution.
